# Supplementary material
Source: Royal Society of Chemistry journal article supplement (doi:10.1039/d6qm00175k)
Supplement: d6qm00175k1.pdf [file d6qm00175k1.pdf]

**SiCl<sub>4</sub>-Modified Layered Double Hydroxides for Boosting CO Selectivity in CO<sub>2</sub> Hydrogenation: Achieving Nearly 100% from Baseline 20%**

*Yuhang Dong<sup>a,†</sup>, Chengcheng Zhang<sup>a,†</sup>, Shenghua Wang<sup>a</sup>, Chuangwang Xing<sup>a</sup>, Shichang Wang<sup>a</sup>, Yi Xiao<sup>a</sup>, Hailong Feng<sup>a</sup>, Ye Wan<sup>d,\*</sup>, Wei Sun<sup>a,b,c,\*</sup> and Deren Yang<sup>a</sup>*

a State Key Laboratory of Silicon Materials and Advanced Semiconductor Materials, and School of Materials Science and Engineering, Zhejiang University, Hangzhou, Zhejiang 310027, People's Republic of China.

Email: [sunnyway423@zju.edu.cn](mailto:sunnyway423@zju.edu.cn)

b Shangyu Institute of Semiconductor Materials, Zhejiang University, Shaoxing 212399, China

c Zhejiang Provincial Key Laboratory of Optoelectronic Functional Materials and Devices, Hangzhou, 311200, China

d China Silicon Corporation Ltd., Luoyang 471023, P. R. China.

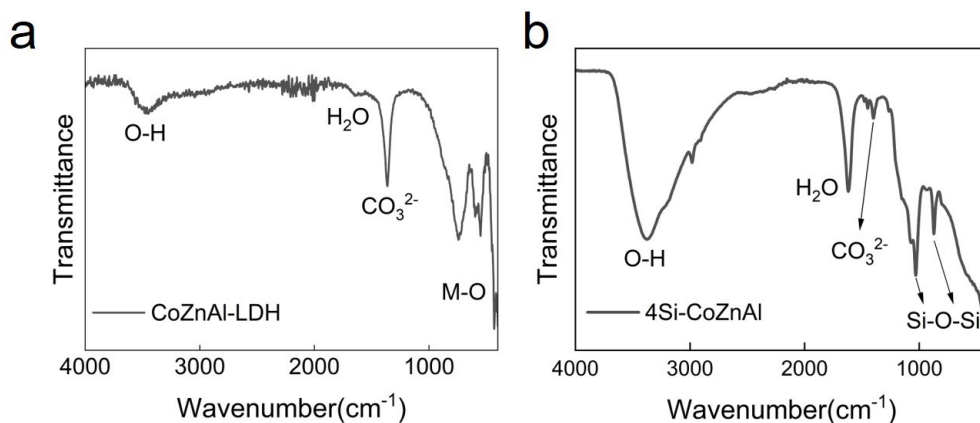

**Fig. S1 FT-IR results of (a) CoZnAl-LDH and (b) 4Si-CoZnAl.** A broad absorption band centered at  $\sim 3375\text{ cm}^{-1}$  is attributed to the O–H stretching vibrations associated with hydrogen-bonded hydroxyl groups<sup>[1]</sup>. The band observed at  $\sim 1618\text{ cm}^{-1}$  corresponds to the H–O–H bending vibration of interlayer water molecules<sup>[2]</sup>. The absorption peak at  $\sim 1398\text{ cm}^{-1}$  is assigned to the  $\nu_3$  asymmetric stretching mode of carbonate ( $\text{CO}_3^{2-}$ ) species<sup>[3]</sup>. For the CoZnAl-LDH sample, the bands in the range of  $500\text{--}800\text{ cm}^{-1}$  are attributed to the lattice vibrations of metal–oxygen bonds (M–O), such as Al–O<sup>[4]</sup>. In contrast, for the 4Si-CoZnAl sample, the newly emerged bands at  $\sim 1029\text{ cm}^{-1}$  and  $\sim 872\text{ cm}^{-1}$  are assigned to the asymmetric stretching vibrations of Si–O bonds, such as Si–O–Si<sup>[5]</sup>. Si–O–Si is formed by the condensation of Si–OH generated from the reaction of Si–Cl with  $\text{H}_2\text{O}$ .

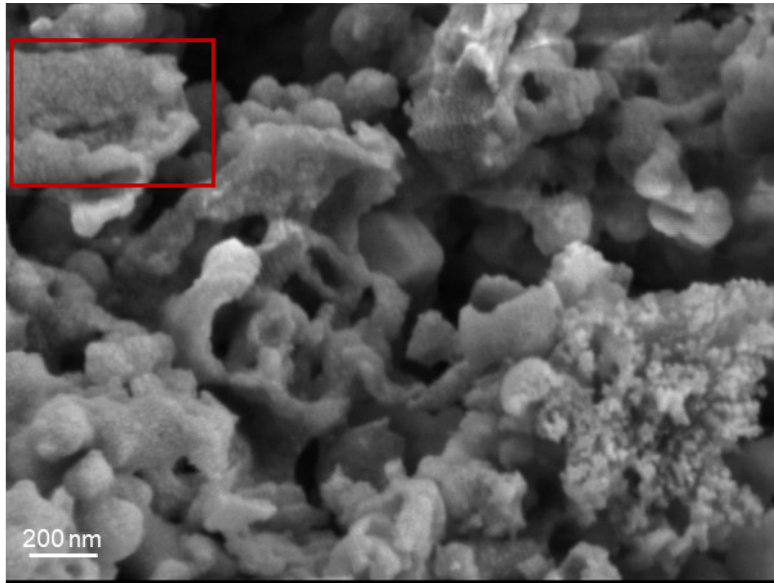

**Fig. S2 SEM image of 4Si-CoZnAl.** It can be observed that the surface is coated with nanospheres.

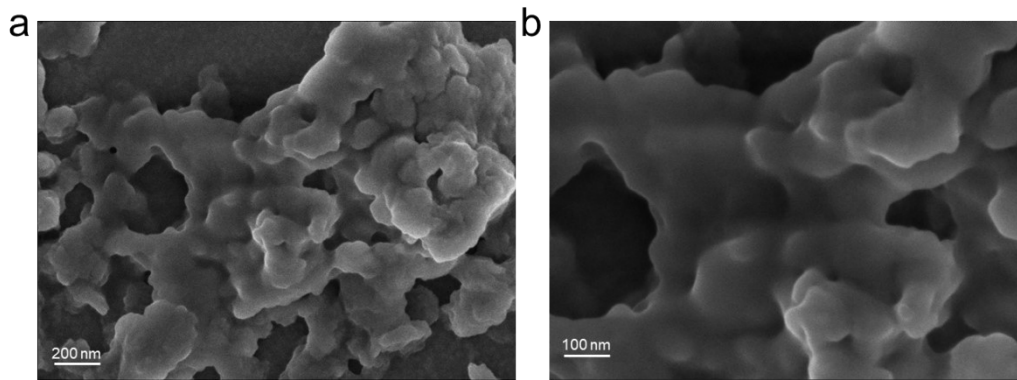

**Fig. S3 SEM images of 2Si-CoZnAl.** The CoZnAl-LDH treated with 2 mL of  $\text{SiCl}_4$  did not exhibit  $\text{SiO}_2$  nanospheres; the full coverage may not be guaranteed.

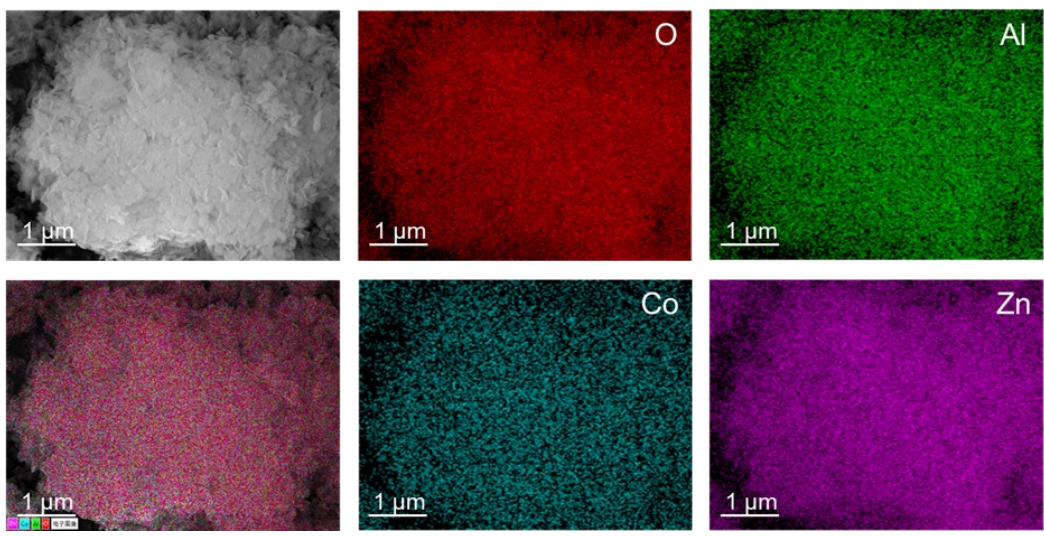

**Fig. S4 EDS results of CoZnAl-LDH**

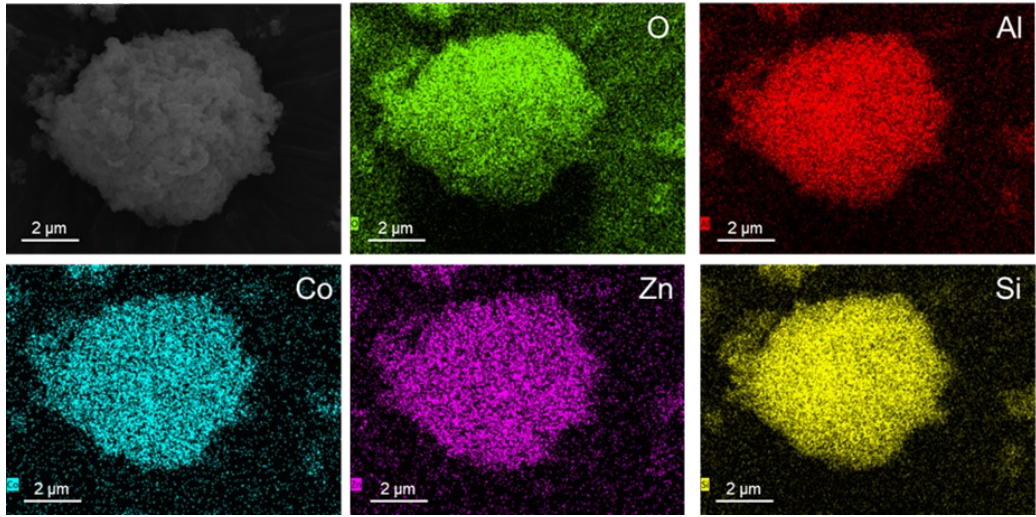

**Fig. S5 EDS results of 4Si-CoZnAl**

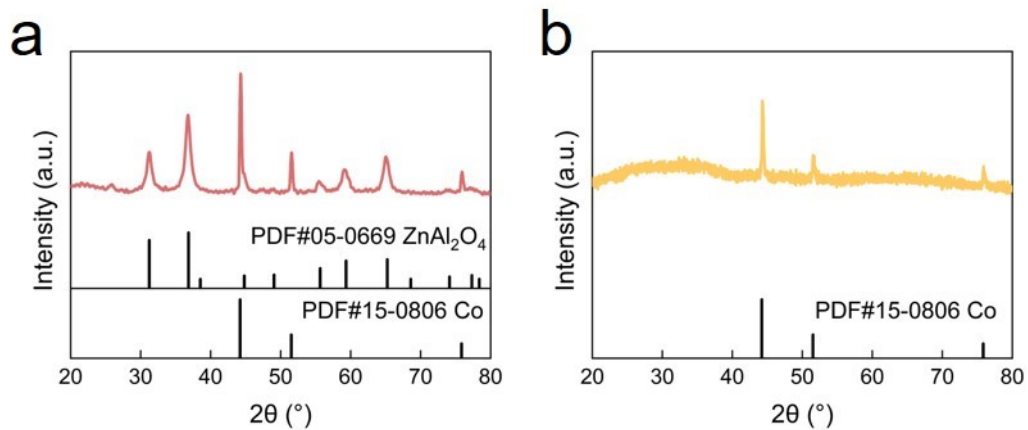

**Fig. S6 XRD results** of (a) CoZnAl-LDH and (b) 4Si-CoZnAl after reduction

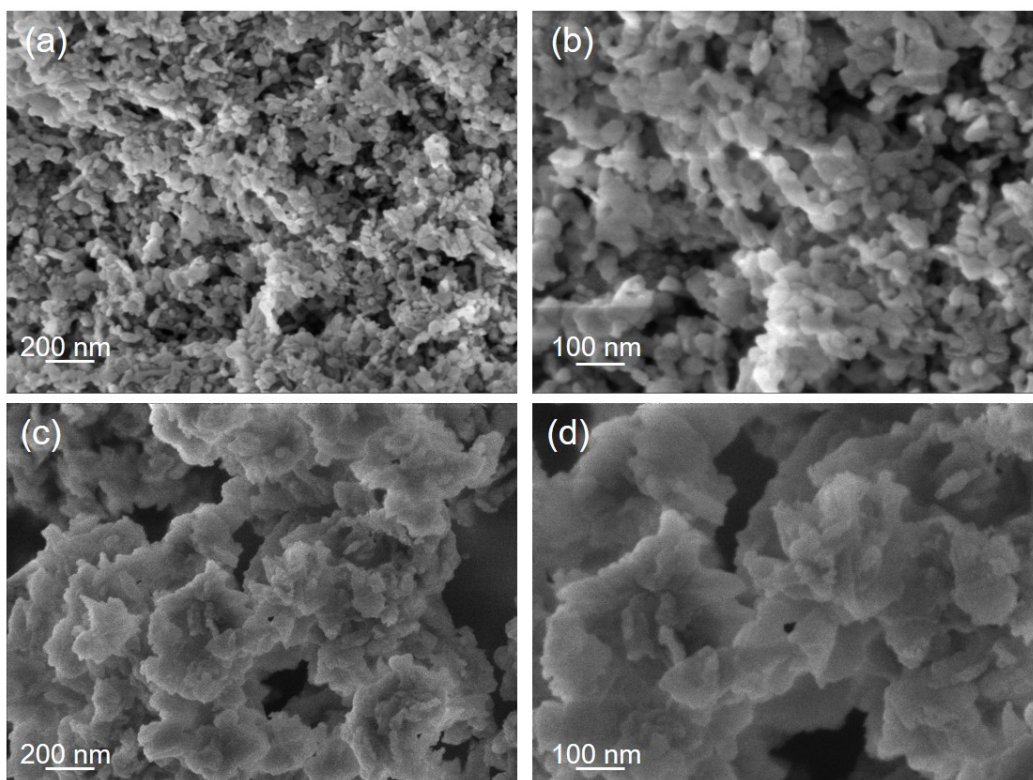

**Fig. S7 SEM images of (a)(b) CoZnAl-LDH and (c)(d) 4Si-CoZnAl after reduction.** Specifically, CoZnAl-LDH transformed from a sheet-like structure into smaller spherical particles, which can be attributed to the collapse of the layered hydroxide structure and phase segregation during calcination and reduction, accompanied by the formation of nanosized metal particles [6]. In contrast, 4Si-CoZnAl was still more intact, maintaining the sheet form, due to the protection of silica. These variations in particle size, together with the degree of silica coverage on the catalyst surface, result in differences in catalytic conversion, while silica modification further influences product selectivity.

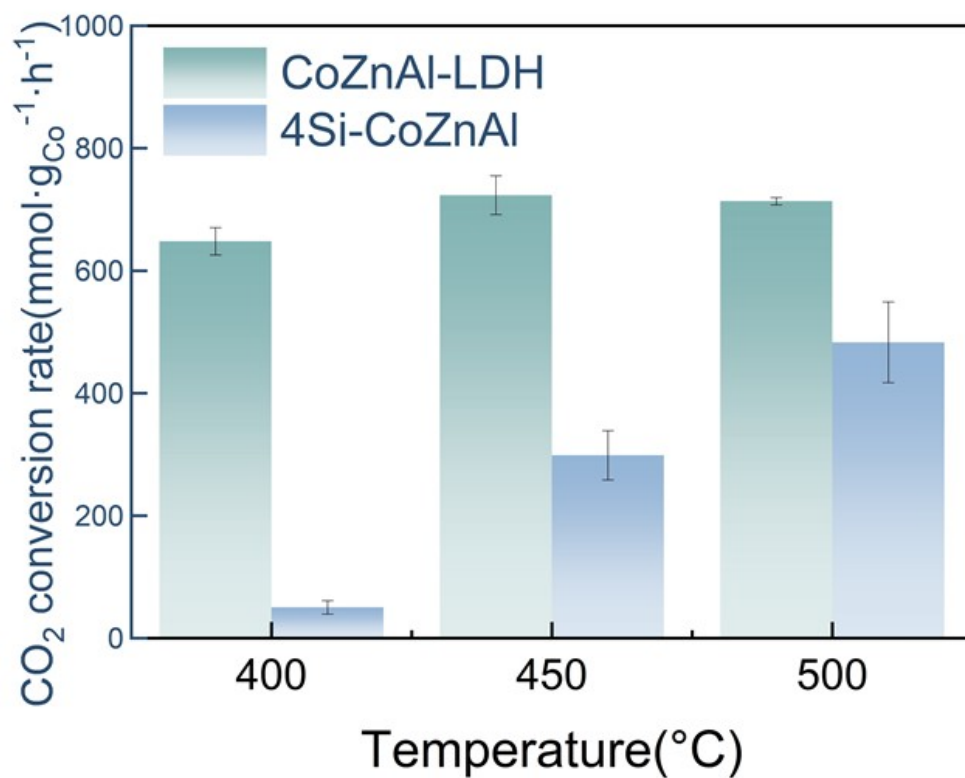

**Fig. S8** Total conversion rate of CoZnAl-LDH and 4Si-CoZnAl normalized to mass of Co (CO<sub>2</sub>: H<sub>2</sub>: N<sub>2</sub> = 4:12:4 mL/min).

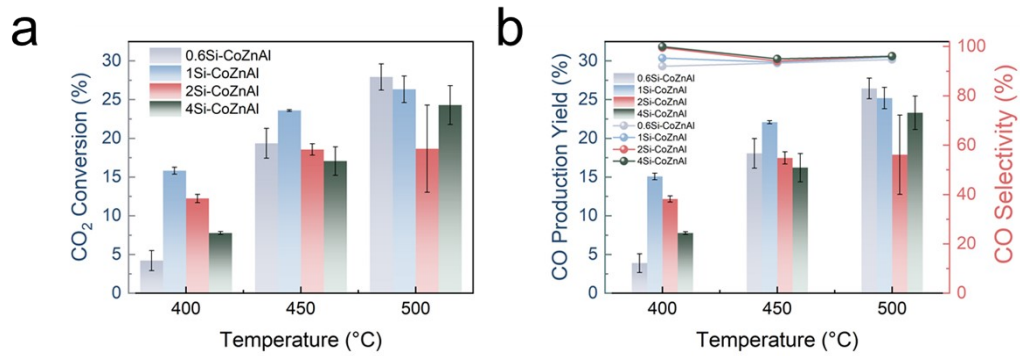

**Fig. S9 Thermocatalytic performance of CO<sub>2</sub> hydrogenation over samples treated with different SiCl<sub>4</sub> ratios (a) CO<sub>2</sub> conversion (b) CO production and selectivity**

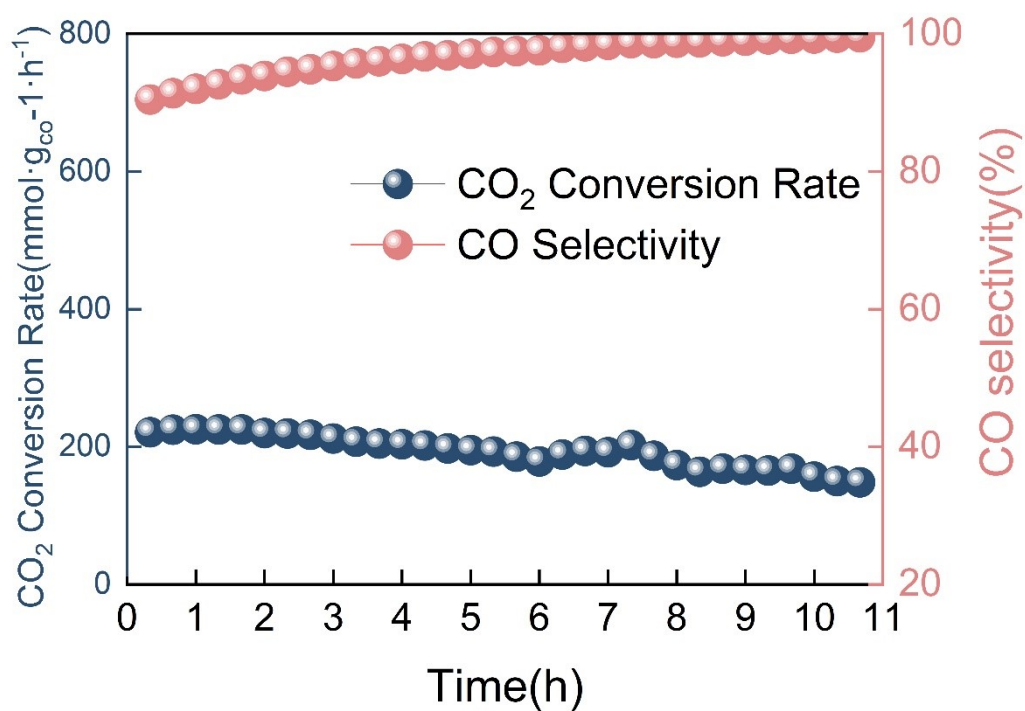

**Fig. S10** Thermal catalytic stability results of 4Si-CoZnAl at 450°C.

**Table S1** Crystallite sizes of CoZnAl-LDH and 4Si-CoZnAl determined via XRD

|            | K    | $\lambda$ (Å) | $\theta$ (°) | FWHM (°) | D (nm) |
|------------|------|---------------|--------------|----------|--------|
| CoZnAl-LDH | 0.89 | 1.54          | 44.29        | 0.29     | 29.2   |
| 4Si-CoZnAl | 0.89 | 1.54          | 44.34        | 0.28     | 30.3   |

- 1 Hubetska, T., Demchenko, V. and Kobylinska, N. Surface engineering: binary Mg,Fe-LDH·xFe<sub>3</sub>O<sub>4</sub> nanocomposites for improved magnetic solid-phase extraction of pharmaceuticals from aqueous solution, *Materials Advances*, 2024, 5, 8145-8163.
- 2 Starukh, G., Rozovik, O. and Oranska, O. Organo/Zn-Al LDH Nanocomposites for Cationic Dye Removal from Aqueous Media, *Nanoscale Res Lett*, 2016, 11, 228.
- 3 Pálinkó, I., Sipos, P., Berkesi, O. and Varga, G. Distinguishing Anionic Species That Are Intercalated in Layered Double Hydroxides from Those Bound to Their Surface: A Comparative IR Study, *The Journal of Physical Chemistry C*, 2022, 126, 15254-15262.
- 4 Mahgoub, S. M., Shehata, M. R., Abo El-Ela, F. L., Farghali, A., Zaher, A. and Mahmoud, R. K. Sustainable waste management and recycling of Zn-Al layered double hydroxide after adsorption of levofloxacin as a safe anti-inflammatory nanomaterial, *RSC Adv*, 2020, 10, 27633-27651.
- 5 Tao, Q., He, H., Frost, R. L., Yuan, P. and Zhu, J. Nanomaterials based upon silylated layered double hydroxides, *Applied Surface Science*, 2009, 255, 4334-4340.
- 6 Hobbs, Christopher, Jaskaniec, Sonia, McCarthy, Eoin K., Downing, Clive, Opelt, Konrad, Güth, Konrad, Shmeliov, Aleksey, Mourad, Maurice C. D., Mandel, Karl, Nicolosi, Valeria. Structural transformation of layered double hydroxides: an in situ TEM analysis[J]. *Npj 2D materials and applications*, 2018, 2, 4.
